# Supplementary material
Source: ML conference proceedings conference paper supplement (https://www.ecva.net/papers/eccv_2020/papers_ECCV/html/123490613_ECCV_2020_paper.php)
Supplement: Supplementary file 2 [file 123490613-supp.zip]

Archive with 28 entries (23 files):
- 2632-supp/
- 2632-supp/Sound results/
- 2632-supp/Sound results/README.txt
- 2632-supp/Sound results/example1/
- 2632-supp/Sound results/example1/VIDEO_0317_cropped_000016.mp4
- 2632-supp/Sound results/example1/mic_3_input.wav
- 2632-supp/Sound results/example1/mic_8_input.wav
- 2632-supp/Sound results/example1/mic_1_gt.wav
- 2632-supp/Sound results/example1/mic_1_pred.wav
- 2632-supp/Sound results/example1/mic_6_pred.wav
- 2632-supp/Sound results/example1/mic_6_gt.wav
- 2632-supp/Sound results/example2/
- 2632-supp/Sound results/example2/VIDEO_0311_cropped_000040.mp4
- 2632-supp/Sound results/example2/mic3_input.wav
- 2632-supp/Sound results/example2/mic8_input.wav
- 2632-supp/Sound results/example2/mic6_gt.wav
- 2632-supp/Sound results/example2/mic1_pred.wav
- 2632-supp/Sound results/example2/mic1_gt.wav
- 2632-supp/Sound results/example2/mic6_pred.wav
- 2632-supp/Sound results/example3/
- 2632-supp/Sound results/example3/VIDEO_0322_cropped_000042.mp4
- 2632-supp/Sound results/example3/mic1_pred.wav
- 2632-supp/Sound results/example3/mic6_pred.wav
- 2632-supp/Sound results/example3/mic1_gt.wav
- 2632-supp/Sound results/example3/mic8_input.wav
- 2632-supp/Sound results/example3/mic6_gt.wav
- 2632-supp/Sound results/example3/mic3_input.wav
- 2632-supp/2632-supplementary.pdf
