# Supplementary material
Source: ML conference proceedings conference paper supplement (https://www.ecva.net/papers/eccv_2020/papers_ECCV/html/123490613_ECCV_2020_paper.php)
Supplement: Supplementary file 2 [file 123490613-supp.zip › 2632-supp/Sound results/README.txt]

Inputs

1) mic3 --> mic3_input
2) mic8 --> mic8_input

Outputs

Ground truth
1) mic1 --> mic1_gt
2) mic6 --> mic6_gt

Predicted
3) mic1 --> mic1_pred
4) mic6 --> mic6_pred
